# Supplementary material
Source: PubMed Central journal article supplement (PMC11030748)
Supplement: 262_2008_489_MOESM1_ESM.pdf [file 262_2008_489_MOESM1_ESM.pdf]

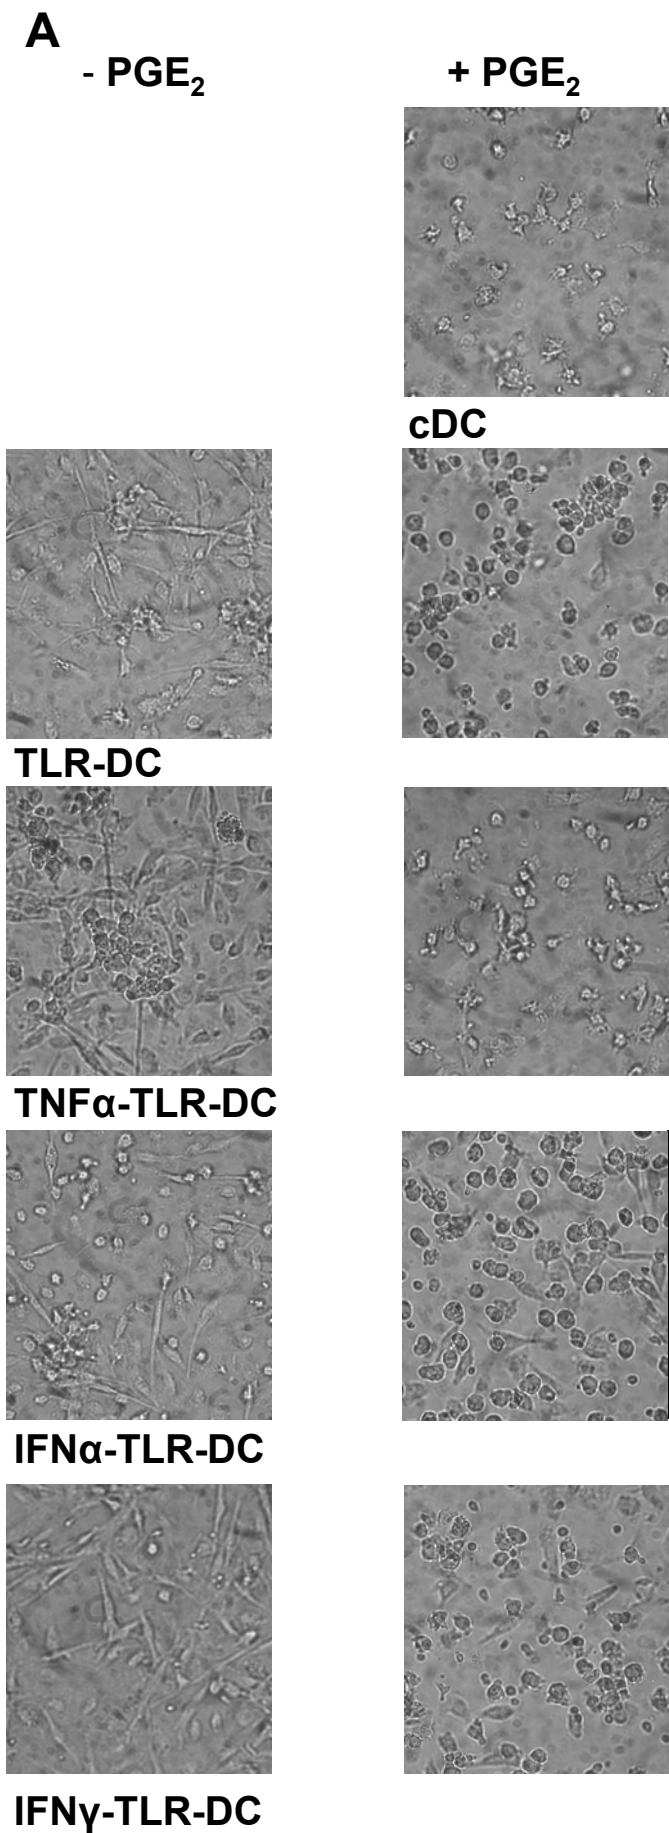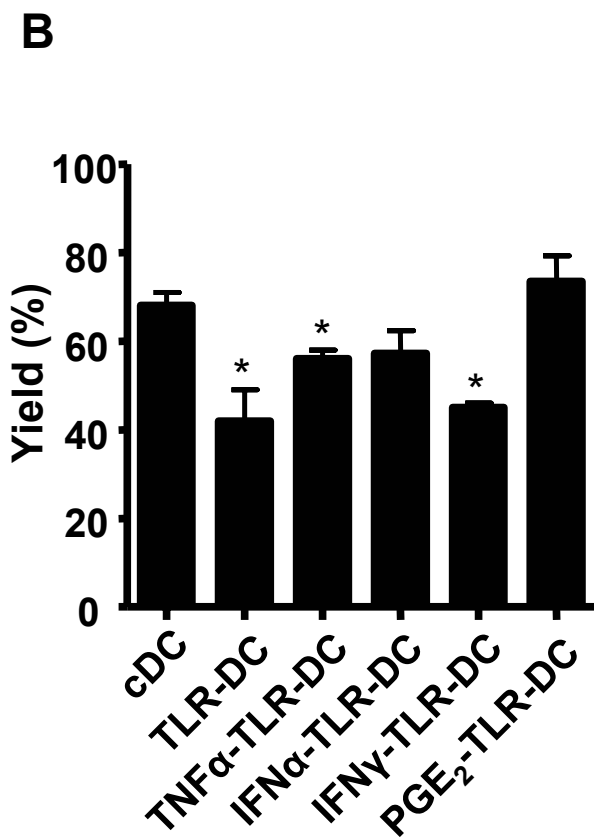

**Supplementary figure 1. Morphology and yield of differently matured DC with and without the addition of PGE<sub>2</sub>.**

(a) DC were matured with the conventional cytokine cocktail (TNF $\alpha$ , IL-6, IL-1 $\beta$  and PGE<sub>2</sub>), poly(I:C) and R848 or poly(I:C) and R848 in the combination with TNF $\alpha$ , IFN $\alpha$ , IFN $\gamma$  or PGE<sub>2</sub> for 48 hours. Pictures show the morphology in culture as seen by light microscopy. (b) The increased adherence of TLR-DC is reflected in a lower yield. The yield of differently matured DC cultures from three donors is depicted. Error bars show the standard deviation \* = p<0,05 compared to the cDC using the unpaired T-test.

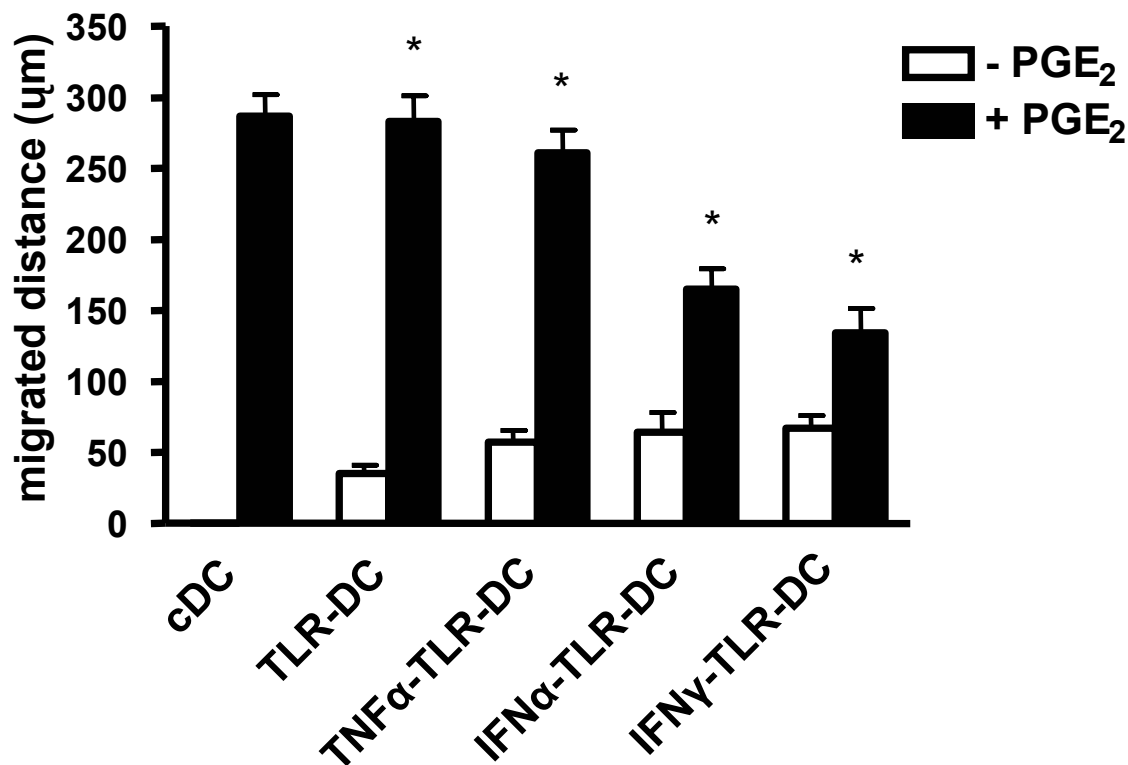

**Supplementary figure 2. Effect of PGE<sub>2</sub> on the migration on fibronectin of DC matured with different maturation cocktails.**

Mean migrated distance on fibronectin during one hour. Experiment is done in 3 donors. One representative experiment is shown, error bars show the standard deviation in one experiment.

\* = p<0,05 comparing the cocktail with and without PGE<sub>2</sub> using the paired T-test
